# Supplementary material for: Growth factors with valproic acid restore injury-impaired hearing by promoting neuronal regeneration
Source: JCI Insight. 2021 Nov 22;6(22):e139171. doi: 10.1172/jci.insight.139171 (PMC8663787; doi:10.1172/jci.insight.139171)
Supplement: Supplemental data [file jciinsight-6-139171-s065.pdf]

## Supplemental data

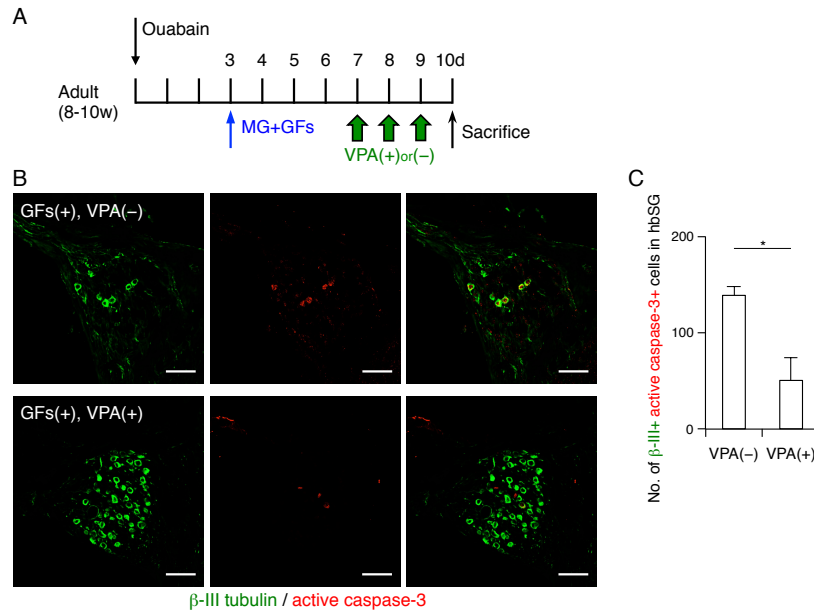

### Supplemental Figure 1. VPA promotes survival of β-III tubulin-positive neurons.

(A) Experimental scheme for investigating survival of SGNs in response to VPA administration. (B) Representative images of active caspase-3-positive SGNs, comparing with or without VPA treatment 10 days after ouabain administration. In both cases, GFs were administered three days after ouabain administration. (Scale bars, 50 μm.) (C) Quantification of the total number of active caspase-3-positive cells per hbSG, from data in (B) ( $n \geq 3$  animals each; error bars are mean  $\pm$  SEM;  $*P \leq 0.05$ ; Student's  $t$  test).

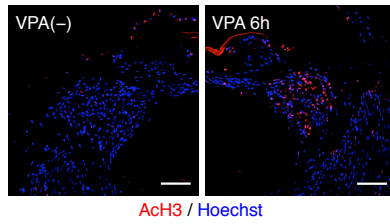

**Supplemental Figure 2. VPA treatment increases histone acetylation in the SG.**

Left: Representative image of a VPA-untreated SG section stained with anti-acetylated histone H3 (AcH3) antibody (red). Nucli were counterstained with Hoechst (blue). Right: Representative image of a SG section 6 hours after VPA treatment, stained with anti-AcH3 antibody (red). Nucli were counterstained with Hoechst (blue). (Scale bars, 50  $\mu\text{m}$ .)

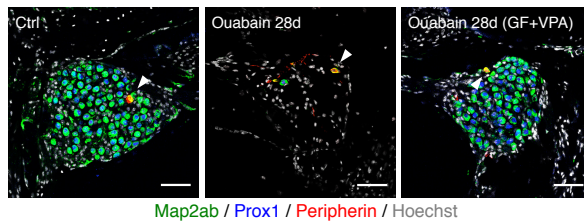

**Supplemental Figure 3. Type I and Type II SGNs before and after injury in the SG.**

Left: Prox1-positive Type I and Peripherin-positive Type II SGNs in intact SGNs.

Middle: Type I but not Type II SGNs dramatically decreased 28 days after ouabain administration. Right: Type I but not Type II SGCs were regenerated when treated with

a combination of GFs and VPA after ouabain administration. The arrows indicate Peripherin-positive Type II SGNs. (Scale bars, 50  $\mu$ m.)
